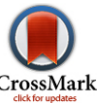

## Correction

# Correction: The Gut Microbial Community of Midas Cichlid Fish in Repeatedly Evolved Limnetic-Benthic Species Pairs

The *PLOS ONE* Staff

There is an error in the Materials and Methods section, regarding the authors' data availability. Under the subheading "DNA extraction, amplification and sequencing" in the final sentence, the correct statement should read as follows: "Raw Illumina sequences were deposited into the NCBI's Sequence Read Archive (SRA) database with accession number: SRA160040."

## Reference

1. Franchini P, Fruciano C, Frickey T, Jones JC, Meyer A (2014) The Gut Microbial Community of Midas Cichlid Fish in Repeatedly Evolved Limnetic-Benthic Species Pairs. *PLoS ONE* 9(4): e95027. doi:10.1371/journal.pone.0095027

**Citation:** The *PLOS ONE* Staff (2014) Correction: The Gut Microbial Community of Midas Cichlid Fish in Repeatedly Evolved Limnetic-Benthic Species Pairs. *PLoS ONE* 9(7): e103923. doi:10.1371/journal.pone.0103923

**Published:** July 23, 2014

**Copyright:** © 2014 The *PLOS ONE* Staff. This is an open-access article distributed under the terms of the Creative Commons Attribution License, which permits unrestricted use, distribution, and reproduction in any medium, provided the original author and source are credited.
